# Supplementary material
Source: PubMed Central journal article supplement (PMC3516852)
Supplement: supp_pcs148_pcp-2012-e-00437-File007.pdf [file supp_pcs148_pcp-2012-e-00437-File007.pdf]

## Supplemental information

### Supplemental Table

**Table S1.** Oligonucleotides for Quantitative PCR primers for ChIP analysis

| <b>Gene</b> | <b>Primer sequence</b>                                                                                                                                                                                                                                                                                                                                                                             |
|-------------|----------------------------------------------------------------------------------------------------------------------------------------------------------------------------------------------------------------------------------------------------------------------------------------------------------------------------------------------------------------------------------------------------|
| <i>CCAI</i> | <b>F1</b> 5'-GTG TTG TAA ATT CCT CAA GAC-3'<br><b>R1</b> 5'-GCA TAA GGC CCA TAT CGT TAT TC-3'<br><b>F2</b> 5'-GAT CTG AAG TTG TGT AGA GGA G-3'<br><b>R2</b> 5'-GGC TTC CGA GTC TAT ATC AAG-3'<br><b>F3</b> 5'-GTA GAG AAA GAG GCT GAA GCT A-3'<br><b>R3</b> 5'-CAT GAG GAG CAA TGT GAC ACA C-3'<br><b>F4</b> 5'-CTC AAG CTT CCA CAT GAG ACT C-3'<br><b>R4</b> 5'-GTT ACA GGA AGA CTA TGG ACA AG-3' |
| <i>LHY</i>  | <b>F1</b> 5'-CAC AGC TGG CAC CGT ACC CAC-3'<br><b>R1</b> 5'-CTC AAG TTG CTT CTC TAC GAG C-3'<br><b>F2</b> 5'-GTT AGA GAG GAT TTG AAG CAG-3'<br><b>R2</b> 5'- CAT CGC TCT CGC TGC TTT G-3'<br><b>F3</b> 5'-GGC ATT TCC ACG CAG ATA TTG-3'<br><b>R3</b> 5'-CGG TAA TCA TCC TGT GAA TGA C-3'<br><b>F4</b> 5'-GTG TTG GAA CAT GCA AGA GTC-3'<br><b>R4</b> 5'- CTC CAA GTC TGT CAT GTA GAA G-3'         |
| <i>TOCI</i> | <b>F1</b> 5'-CTT CAG TAC CTA AAG ATA ACA G-3'                                                                                                                                                                                                                                                                                                                                                      |

**R1** 5'-CAA ACA TAT CAA AAG GTC GAC AG-3'

**F2** 5'-GTC GGC TTT ACT TCT TCT AC-3'

**R2** 5'-GTG GAA TCA TTG TCA CAA AGC-3'

**F3** 5'-GGA TCA TCT TGC TGG GTC TC-3'

**R3** 5'-GGA CTC TCC GAT CTT CAA TC-3'

**F4** 5'-GGA ACT TGA AGA TAC ACC AAG AAC-3'

**R4** 5'-CCT TAG AGA CAA CTC GAT ATT CG-3'
